# Supplementary material
Source: PubMed Central journal article supplement (PMC7293577)

# Figure S1

**A**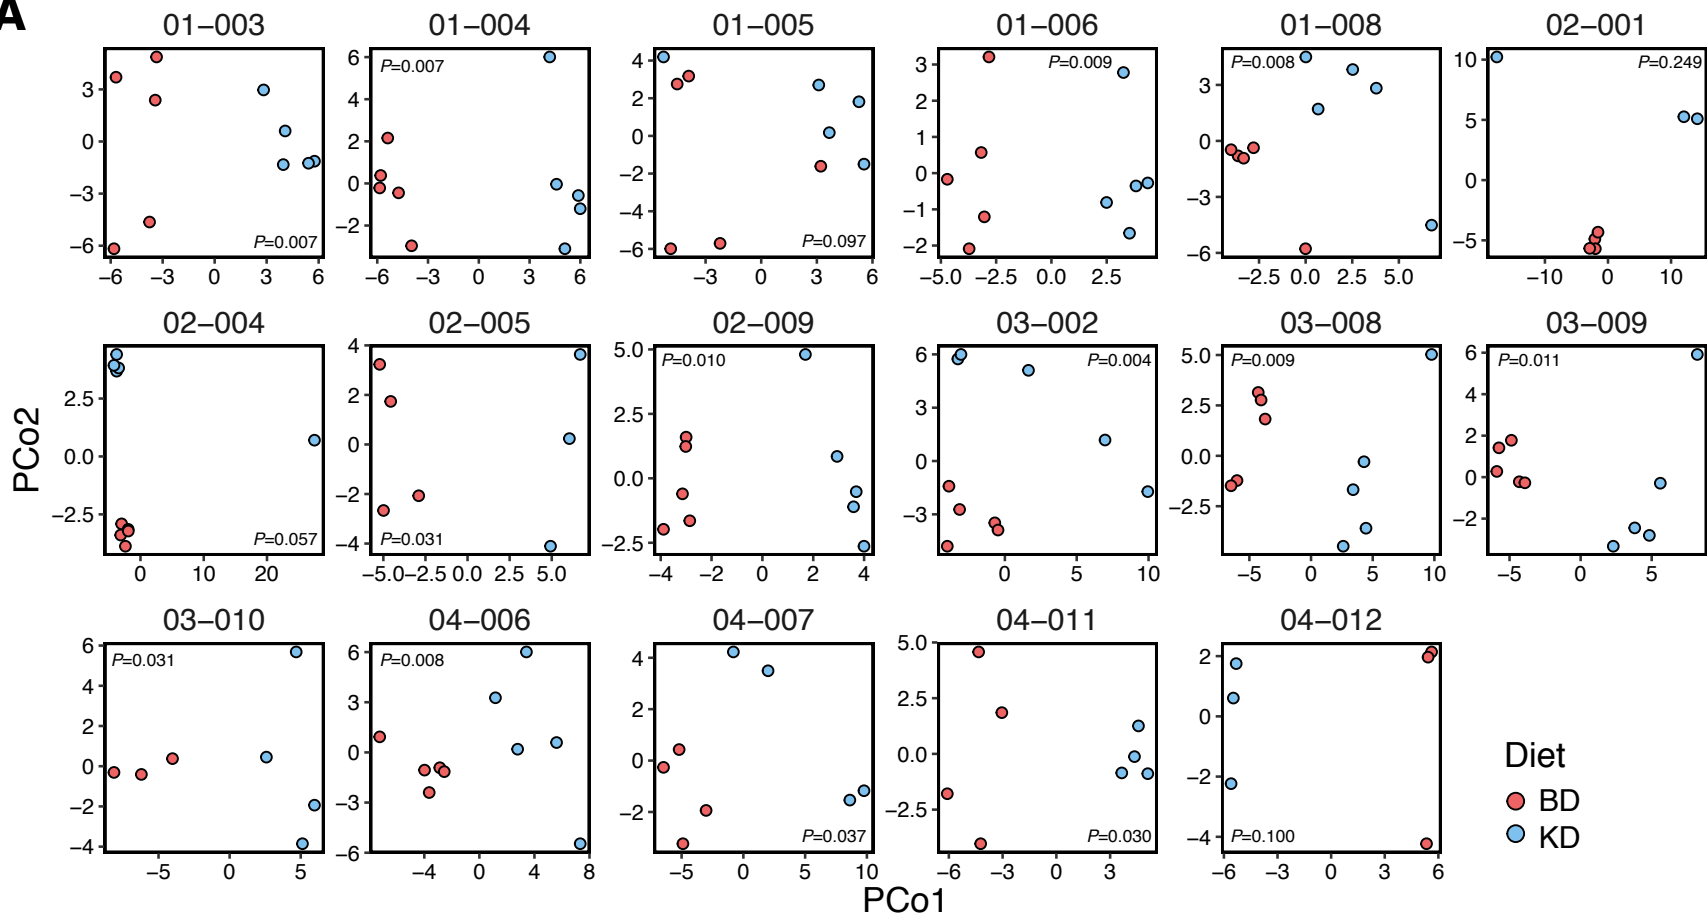**B**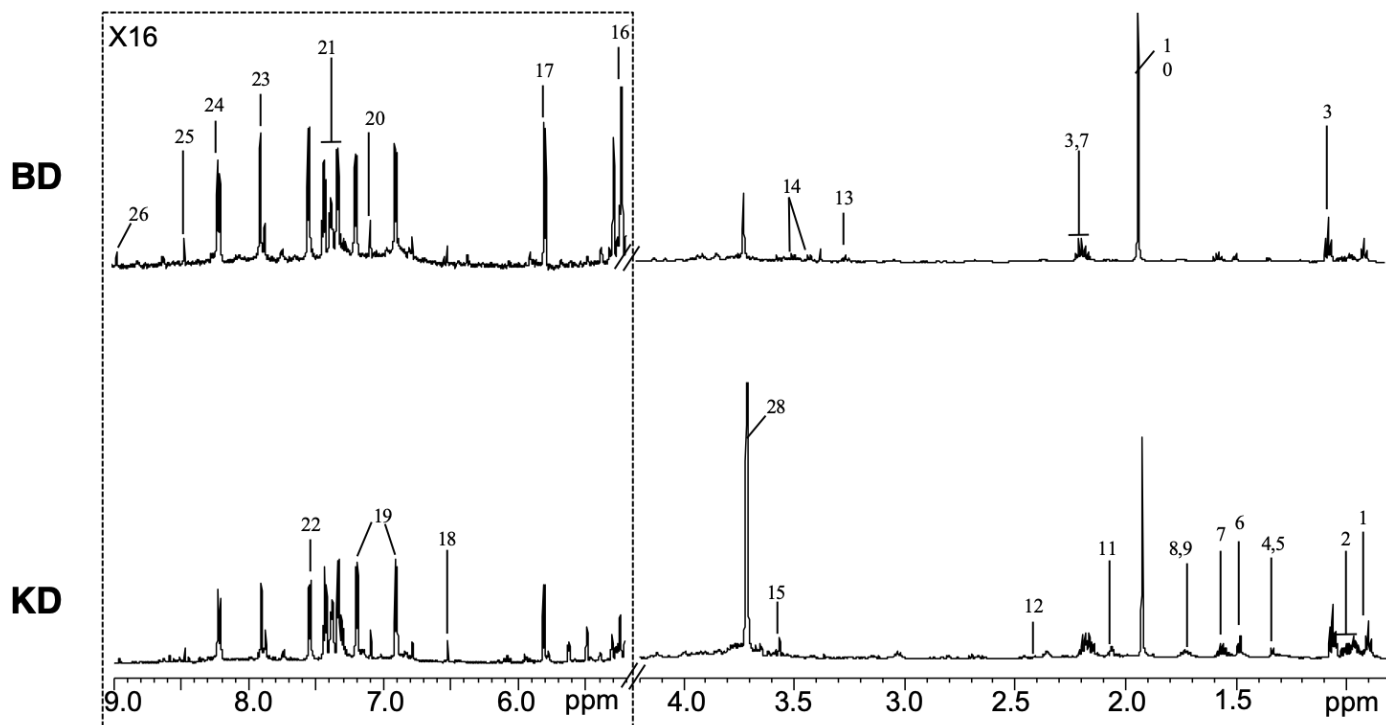

Supplement: NIHMS1586644-supplement-1.pdf [file NIHMS1586644-supplement-1.pdf]

# Figure S2

## Long-term diet experiment (2-3 months)

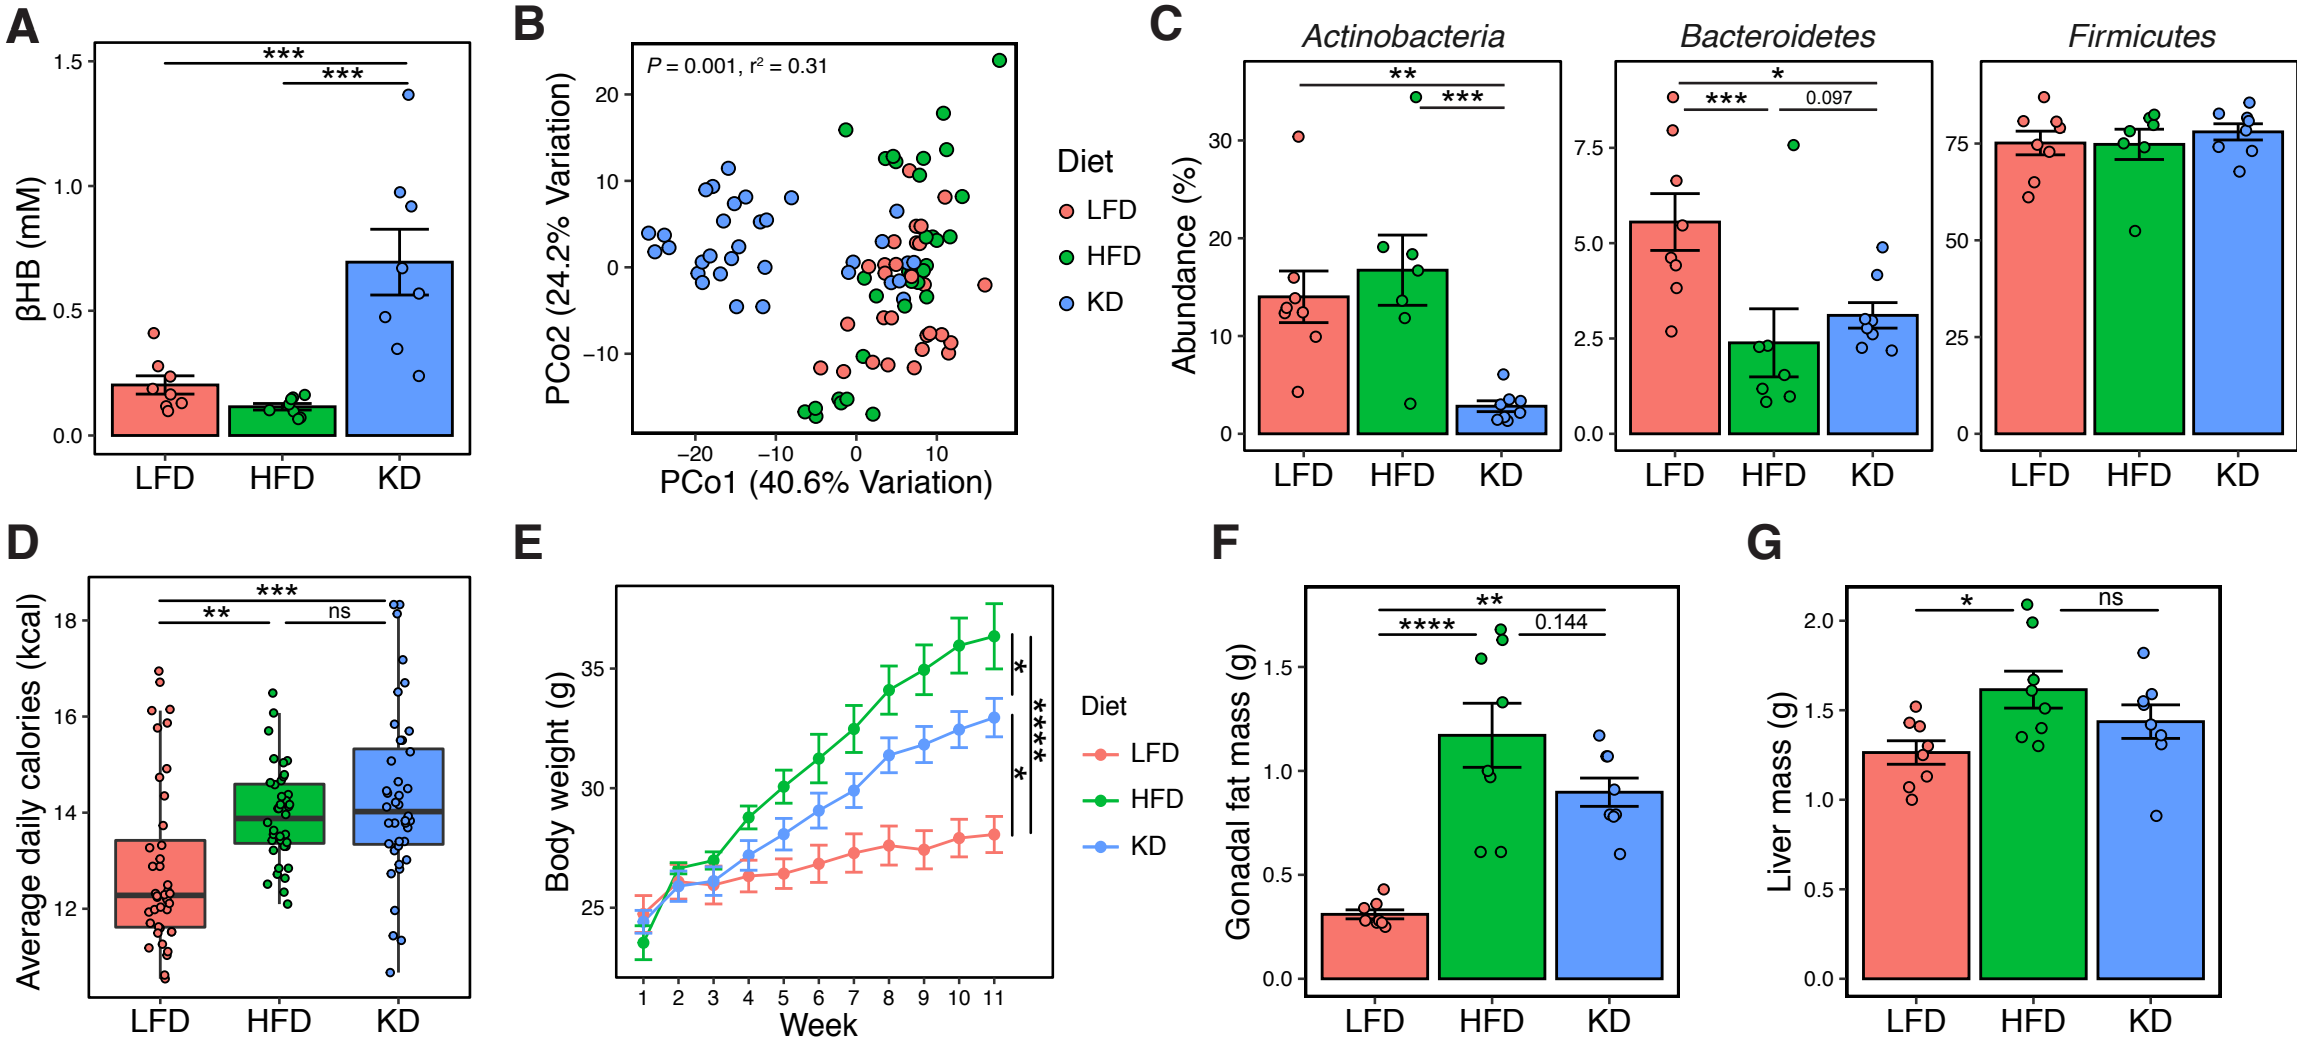

## Longer-term diet experiment (range 1-11 months)

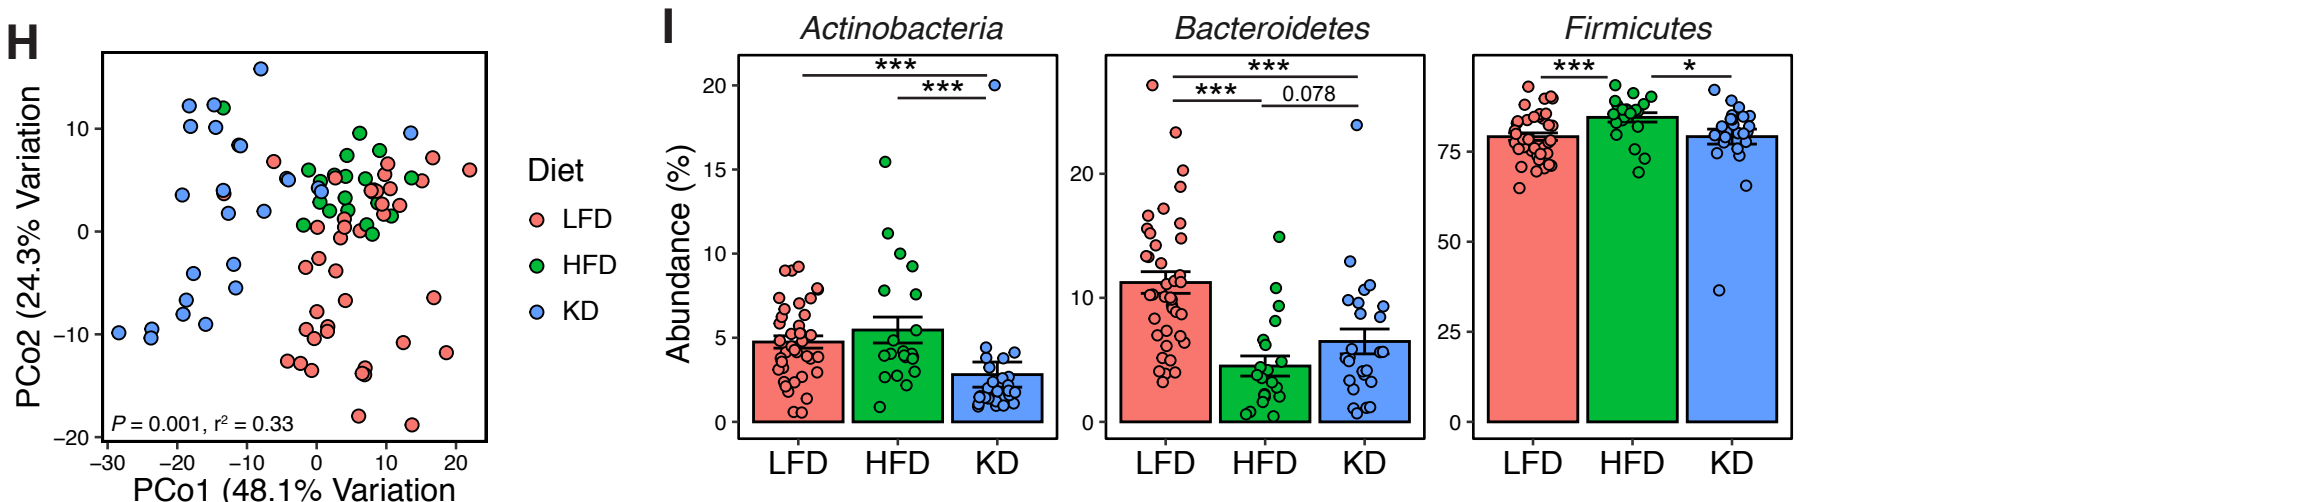

Supplement: NIHMS1586644-supplement-2.pdf [file NIHMS1586644-supplement-2.pdf]

# Figure S3

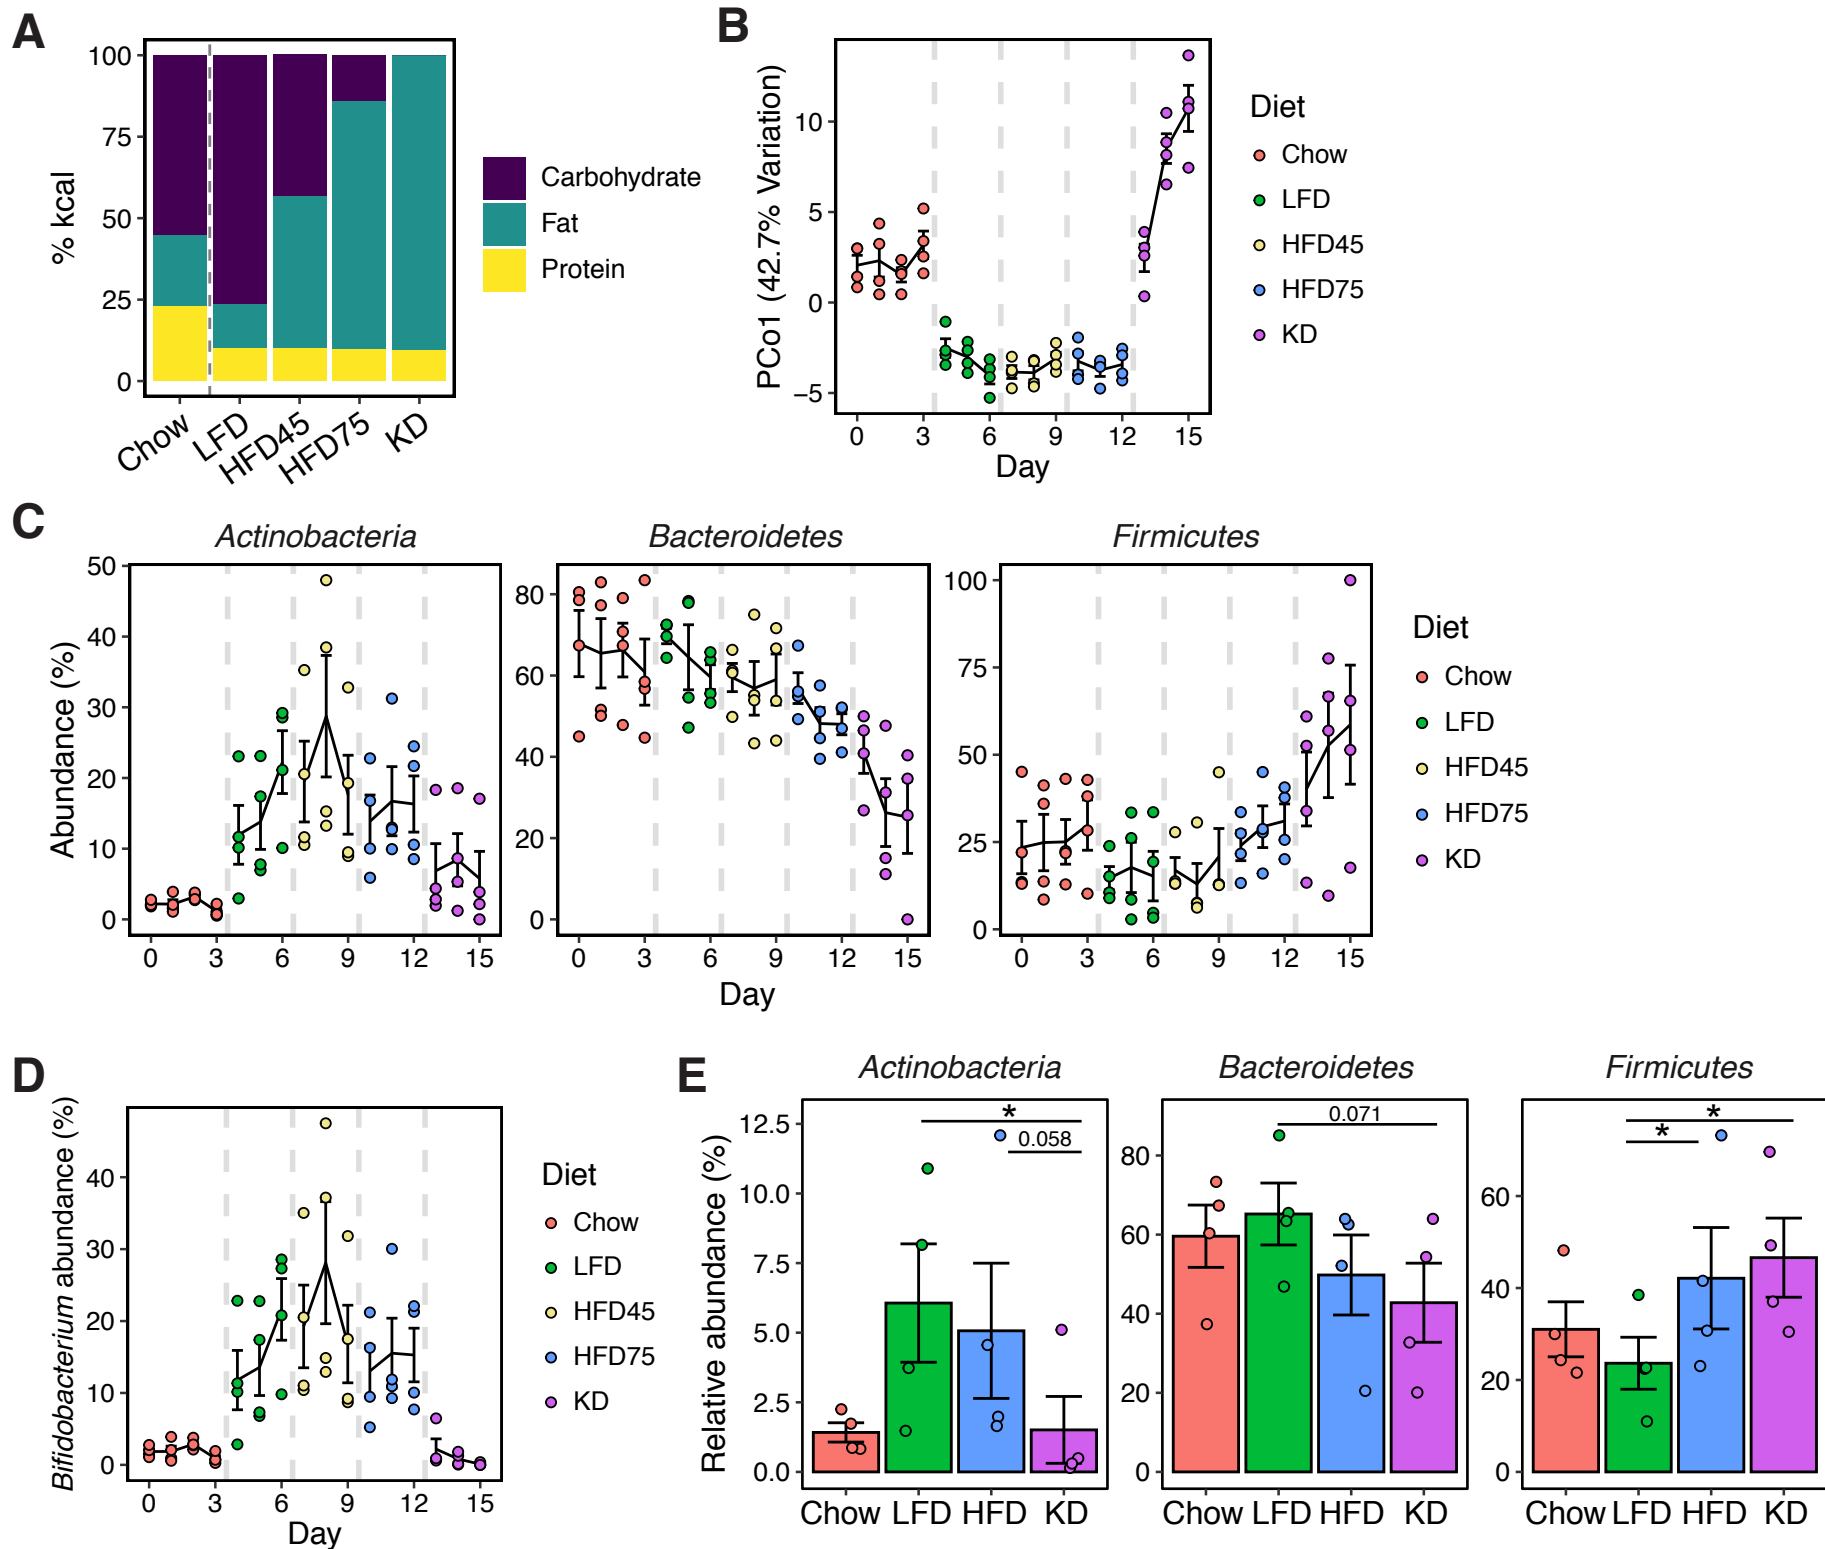

Supplement: NIHMS1586644-supplement-3.pdf [file NIHMS1586644-supplement-3.pdf]

# Figure S4

**A**

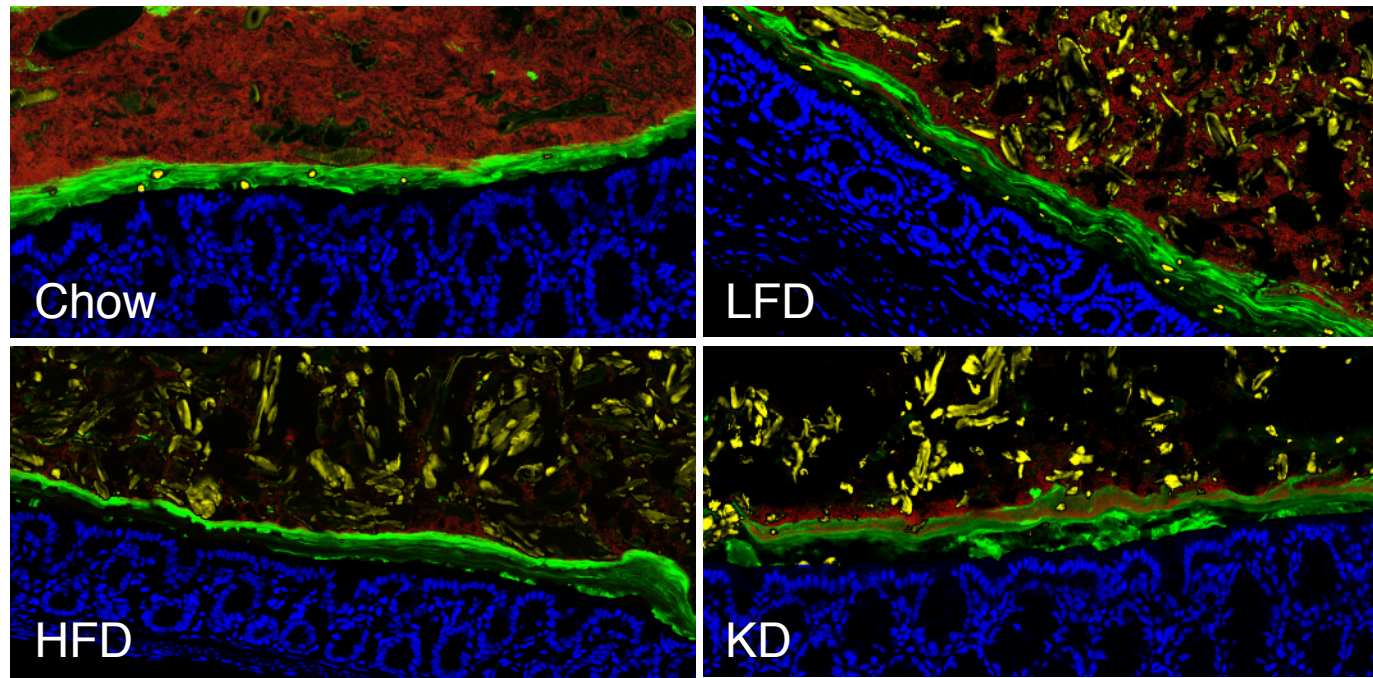

**B**

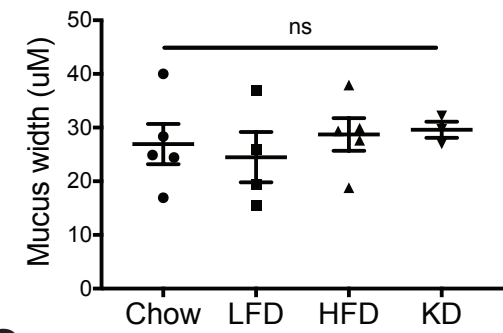

**C**

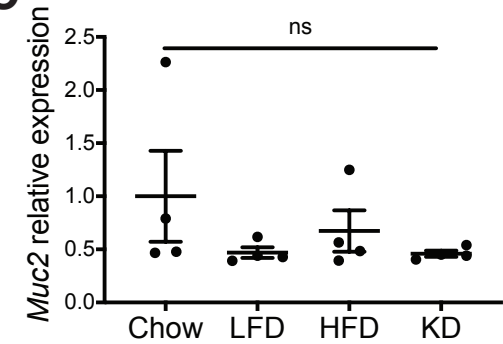

**D**

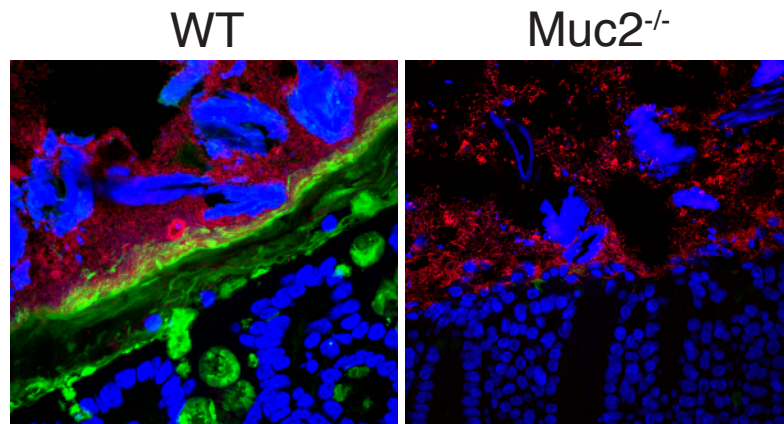

**E**

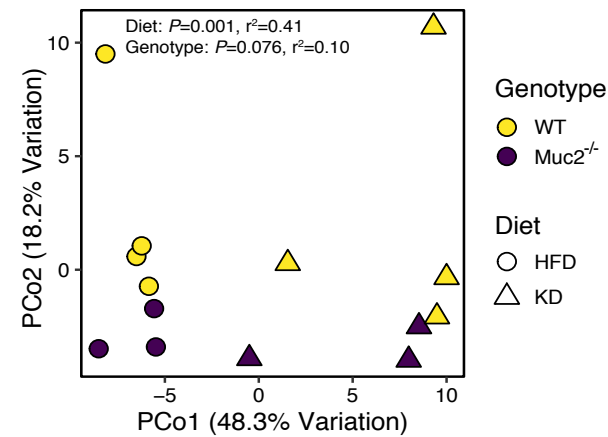

**F**

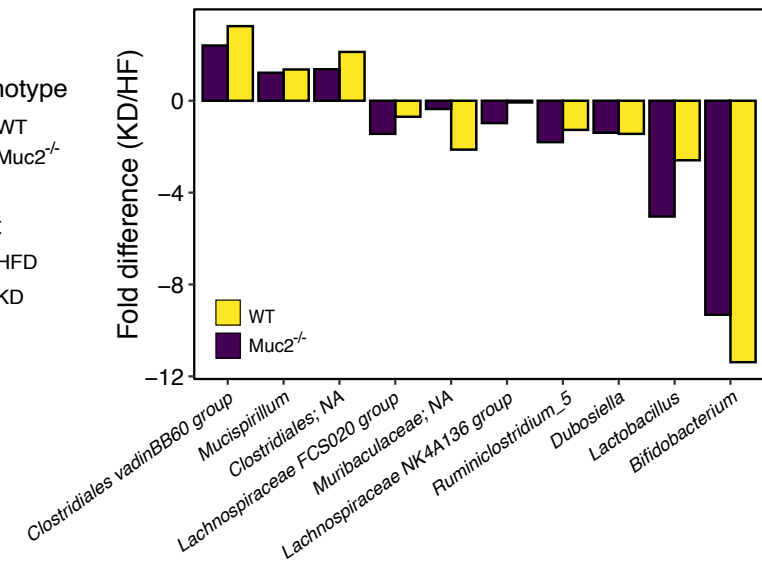

Supplement: NIHMS1586644-supplement-4.pdf [file NIHMS1586644-supplement-4.pdf]

# Figure S5

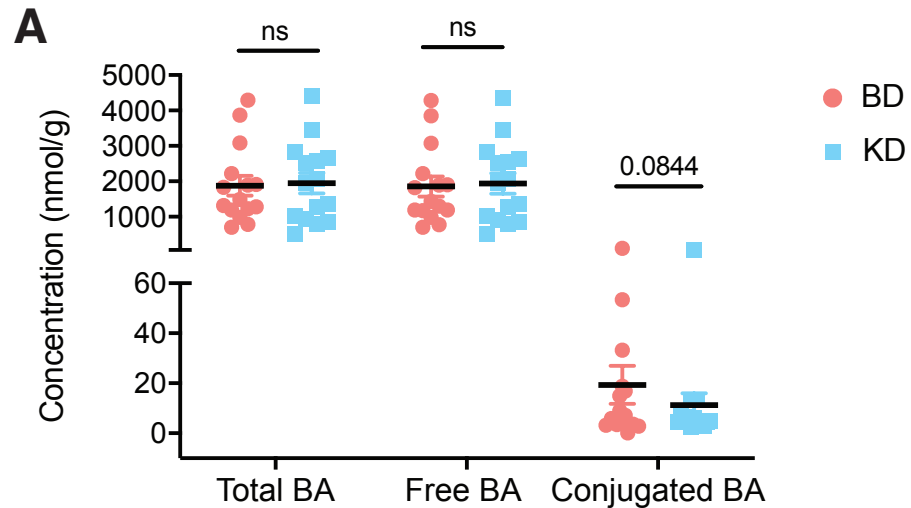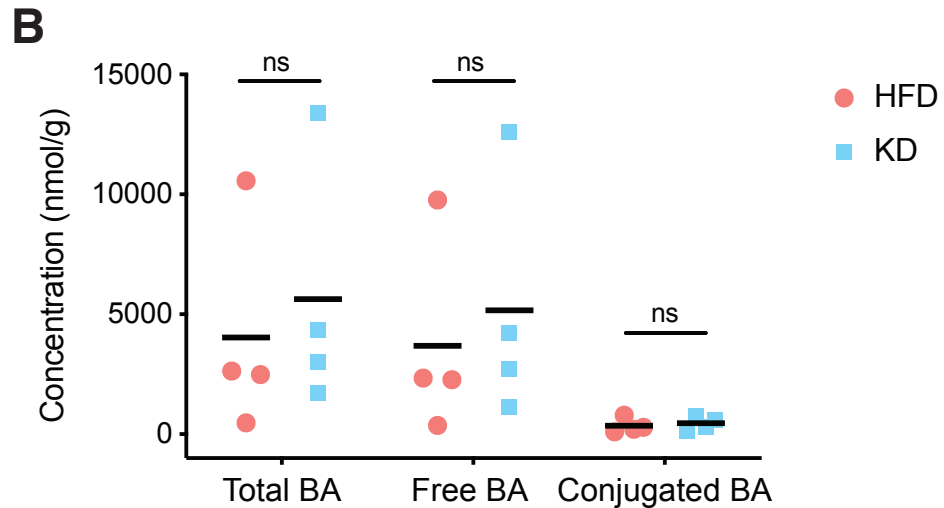

Supplement: NIHMS1586644-supplement-5.pdf [file NIHMS1586644-supplement-5.pdf]

# Figure S6

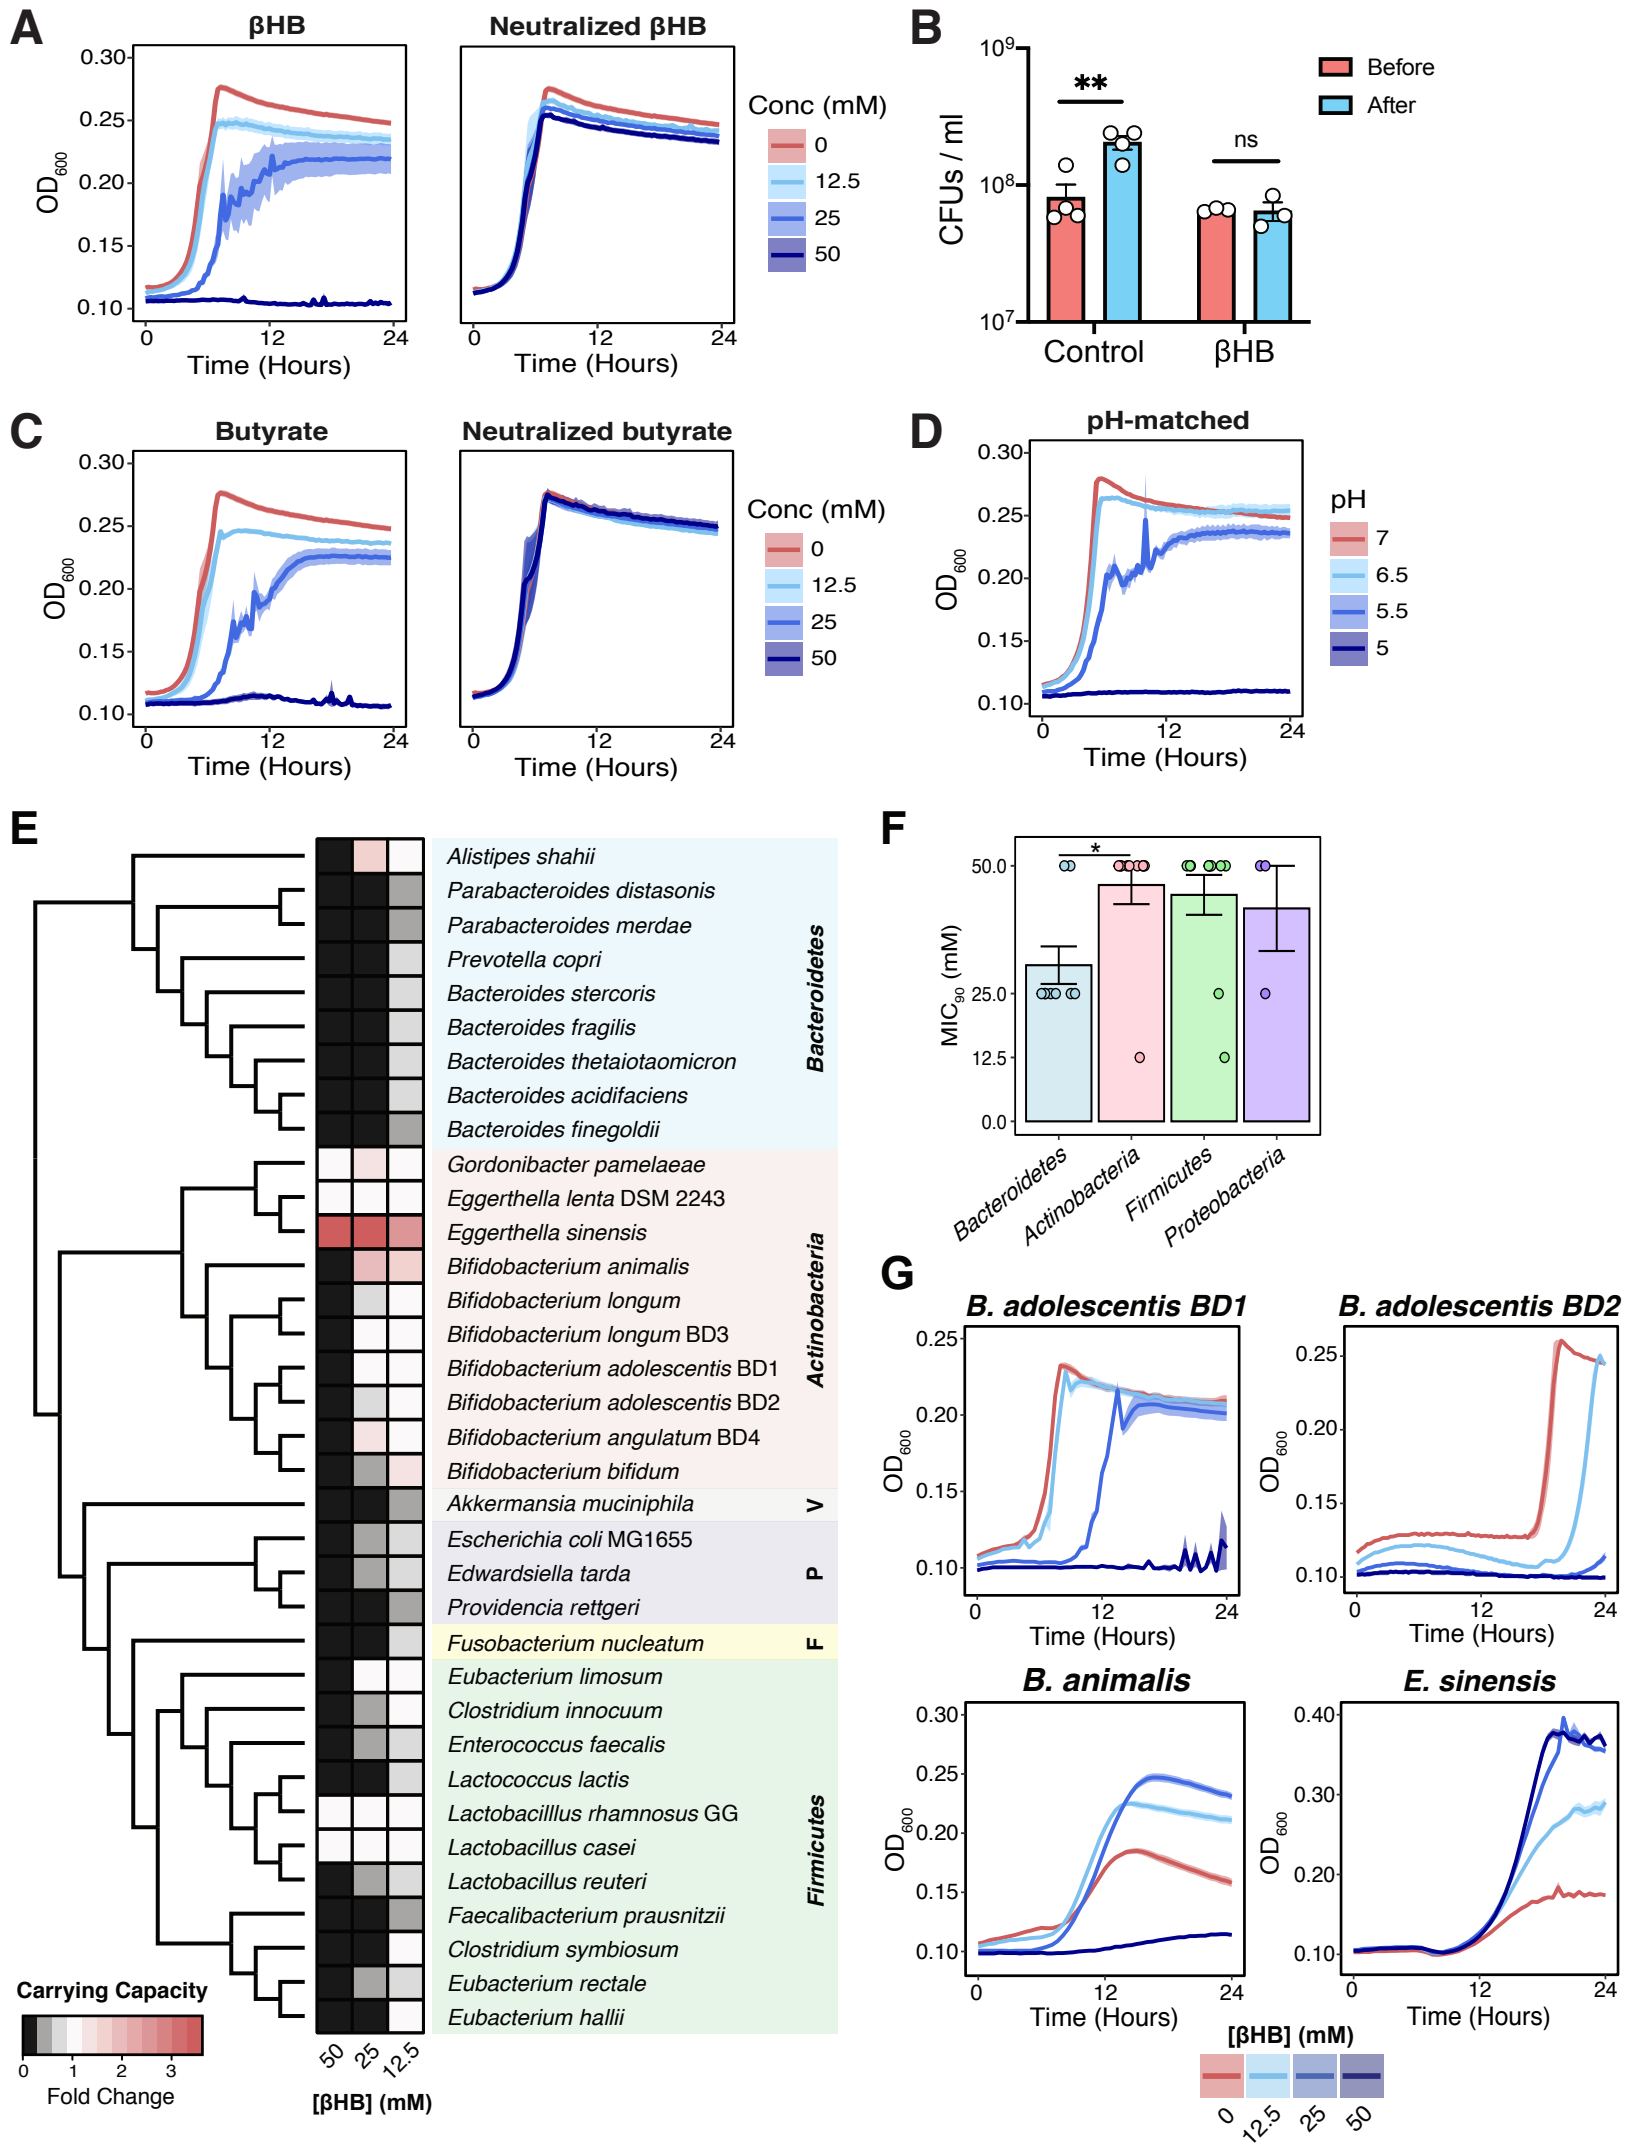

Supplement: NIHMS1586644-supplement-6.pdf [file NIHMS1586644-supplement-6.pdf]

# Figure S7

**A**

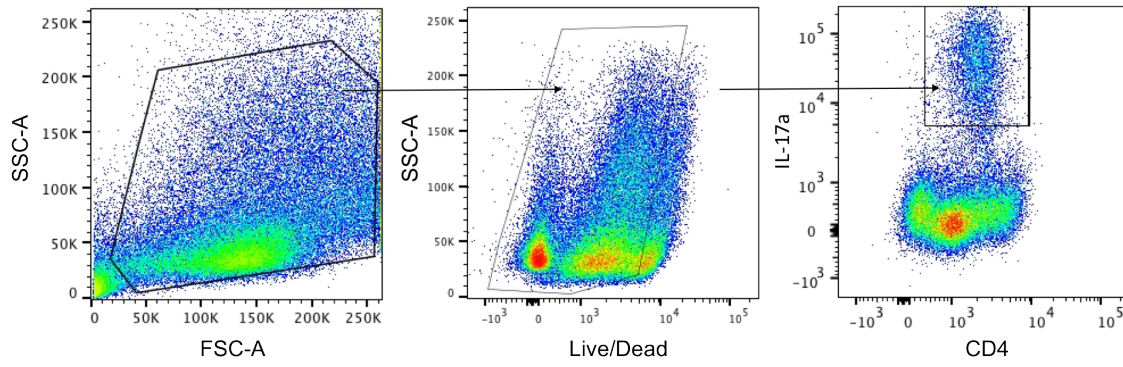

**B**

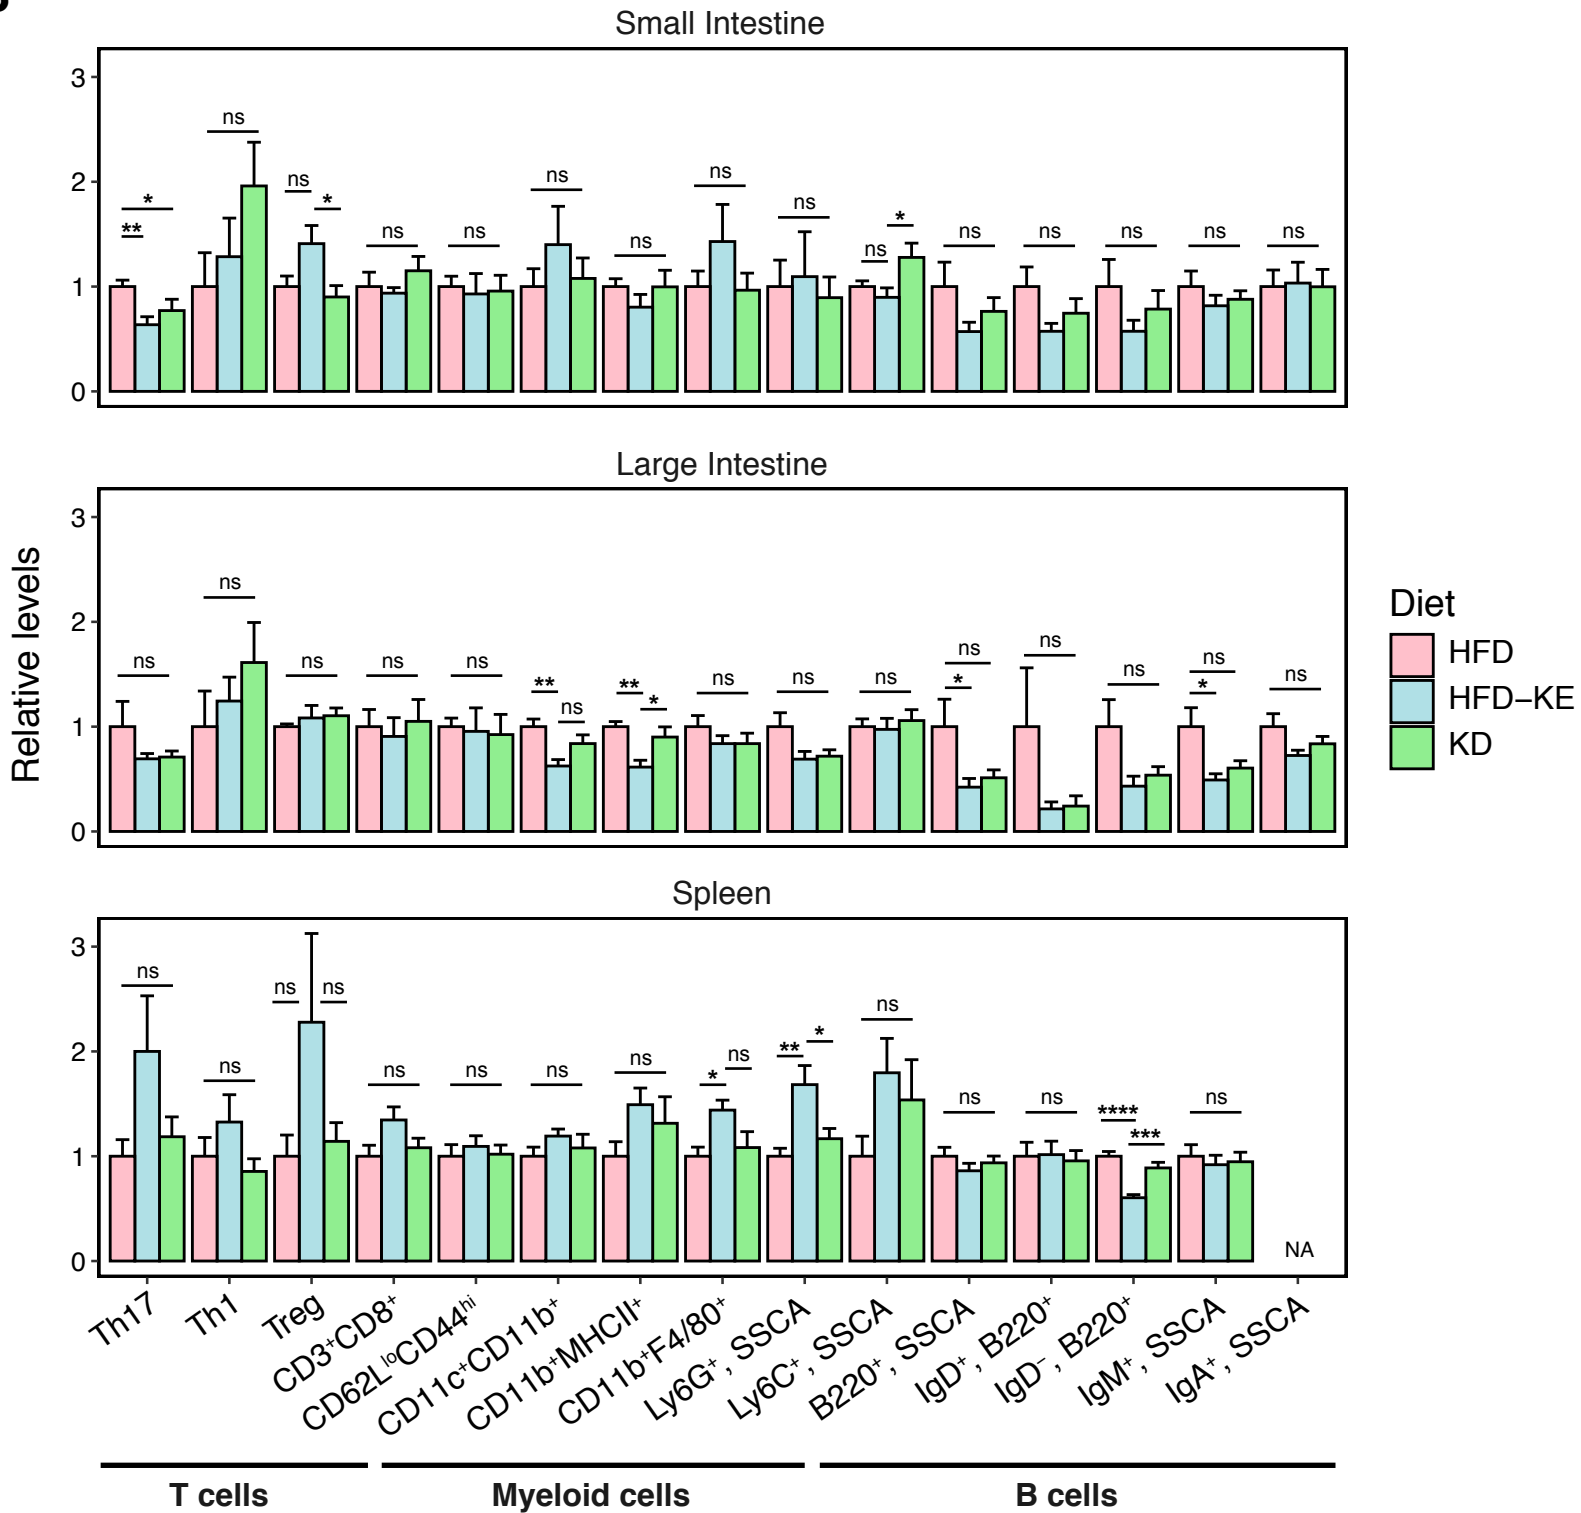

Supplement: NIHMS1586644-supplement-7.pdf [file NIHMS1586644-supplement-7.pdf]
